# Supplementary material for: Synergism between the Antidepressant Sertraline and Caspofungin as an Approach to Minimise the Virulence and Resistance in the Dermatophyte Trichophyton rubrum
Source: MDPI journal article supplement (doi:10.3390/jof8080815), 2022-08-03
Supplement: s1 [file s1]

## Supplementary Data

Synergism between the antidepressant sertraline and caspofungin as an approach to minimise the virulence and resistance in the dermatophyte *Trichophyton rubrum*

**Table S1.** Primer sets used for real-time quantitative reverse transcription polymerase chain reaction (RT-qPCR).

| Protein/gene              | ID         | Primer sequences (5'-3')                                 | Efficiency (%) | Concentration (nM) |
|---------------------------|------------|----------------------------------------------------------|----------------|--------------------|
| C-8 sterol isomerase      | TERG_06755 | Fwd: GGTGGGCTTTAGAGTTAG<br>Rev: GCAGTCAAGTAGCAAGTC       | 110            | 200                |
| Hydrophobin               | TERG_04234 | Fwd: GGCATACATCTTGGTGGTTTC<br>Rev: CAGACAGTGGAGGTGGATGTT | 103            | 300                |
| MFS multidrug transporter | TERG_00162 | Fwd: CTCCTTTGGACCTTTGATCG<br>Rev: TGACGAAGAGAACGTTGCAG   | 102            | 100                |
| Chitin synthase 2         | TERG_12319 | Fwd: AGCCAACTGCCTTGTACCAT<br>Rev: GTAATCCGACCCATCCCTTT   | 103.5          | 200                |
| <i>rpb II</i>             | TERG_05742 | Fwd: TGCAGGAGCTGGTGGAAAGA<br>Rev: GCTGGGAGGTACTGTTGATCAA | 94.99          | 300                |
| <i>gapdh</i>              | TERG_04402 | Fwd: GCGTGACCCAGCCAACA<br>Rev: CGGTGGACTCGACGATGTAGT     | 99.90          | 200                |

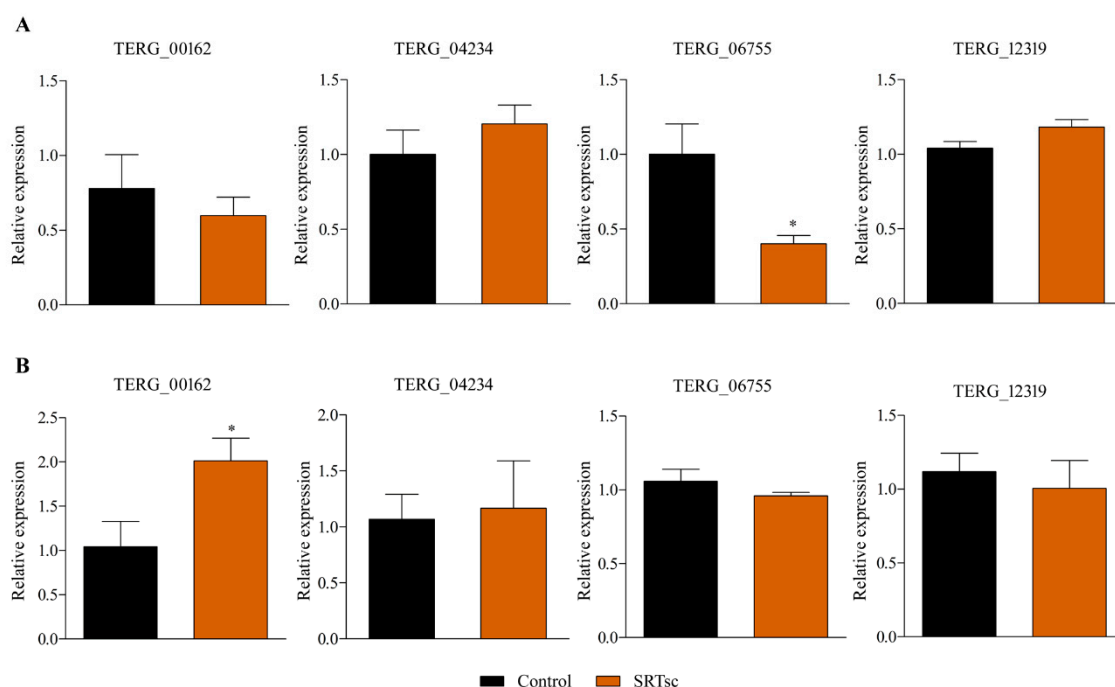

**Figure S1.** Expression of *TERG\_00162* (MFS multidrug transporter), *TERG\_04234* (Hydrophobin), *TERG\_06755* (C-8 sterol isomerase), and *TERG\_12319* (Chitin synthase 2) following SRTsc exposure. Asterisks indicate statistical significance determined by the t-test, compared to the control (SB absence drug) at 3 h (A) and 12 h (B); \*P < 0.05.

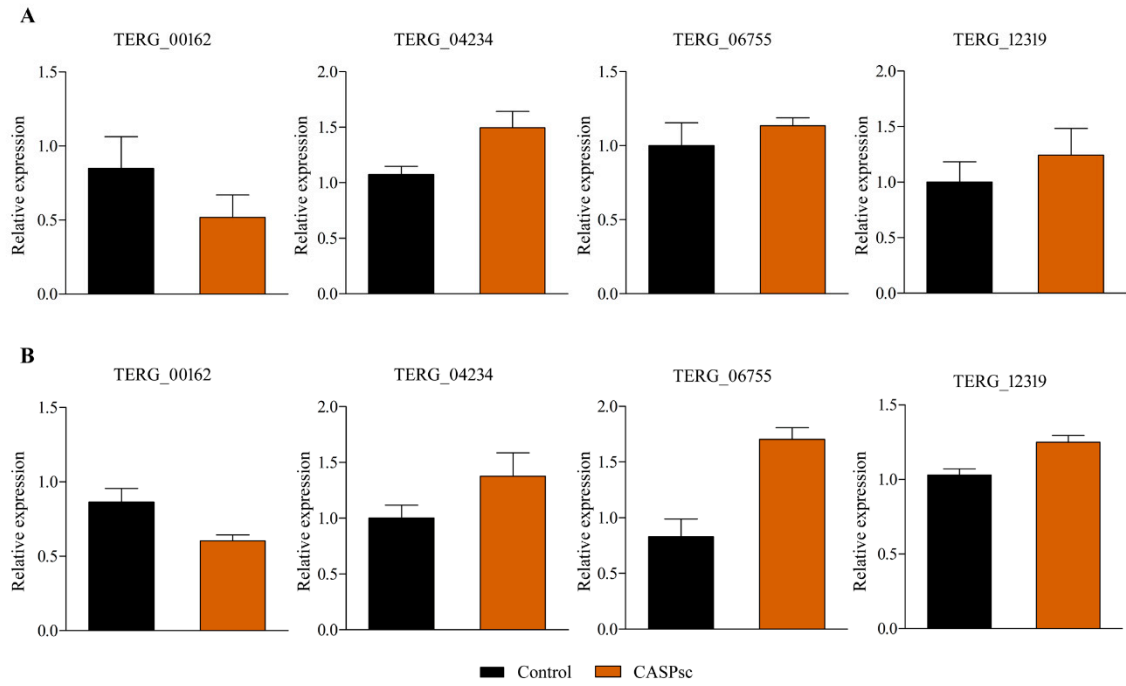

**Figure S2.** Differentially expressed genes, *TERG\_00162* (MFS multidrug transporter), *TERG\_04234* (Hydrophobin), *TERG\_06755* (C-8 sterol isomerase), and *TERG\_12319* (Chitin synthase 2), following exposure to CASPsc when compared to the control (SB absence drug) at 3 h (**A**) and 12 h (**B**).
